# Supplementary material for: Proteomic Profiling of Bronchoalveolar Lavage Fluid in Critically Ill Patients with Ventilator-Associated Pneumonia
Source: PubMed Central journal article supplement (PMC3591362; doi:10.1371/journal.pone.0058782), 2013-03-07

**Figure S1.** Representative BALF Western blots for S100A8 showing increased expression in VAP<sup>+</sup> patients. Please refer to Figure 5 in main manuscript for further results.

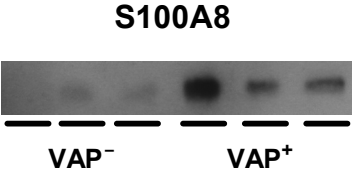

Supplement: pone.0058782.s001.pdf [file pone.0058782.s001.pdf]
