# Supplementary material for: Proteomic Profiling of Bronchoalveolar Lavage Fluid in Critically Ill Patients with Ventilator-Associated Pneumonia
Source: PubMed Central journal article supplement (PMC3591362; doi:10.1371/journal.pone.0058782), 2013-03-07
Supplement: pone.0058782.s002.pdf [file pone.0058782.s002.pdf]

**Table S1.** Detailed characteristics of ALI patients. State of discharge, age, sex, VAP diagnosis, microbiology of bacterial strain(s) detected in culture, number of days on ventilator, P/F ratio, and risk factor provided.

| Subject | State at discharge | Age | Sex | VAP | Microbiology                                                                                 | Vent days* | P/F** | ALI risk factor   |
|---------|--------------------|-----|-----|-----|----------------------------------------------------------------------------------------------|------------|-------|-------------------|
| 1       | Alive              | 60  | M   | Yes | <i>Bifidobacterium scardovii</i>                                                             | 5/18       | 162   | Sepsis            |
| 2       | Alive              | 40  | M   | Yes | <i>Staphylococcus aureus</i> ,<br><i>Streptococci</i>                                        | 2/7        | 185   | Trauma            |
| 3       | Alive              | 76  | M   | Yes | <i>Escherichia coli</i> ,<br><i>Enterococcus</i>                                             | 7/11       | 148   | Trauma            |
| 4       | Alive              | 22  | M   | Yes | <i>Alpha streptococci</i> ,<br>MRSA                                                          | 6/8        | 247   | Sepsis            |
| 5       | Alive              | 56  | M   | Yes | <i>Haemophilus influenzae</i><br><i>Streptococcus</i>                                        | 3/13       | 240   | Trauma            |
| 6       | Alive              | 56  | M   | Yes | <i>pseudopneumoniae</i> ,<br><i>Staphylococcus aureus</i> ,<br><i>Haemophilus influenzae</i> | 6/19       | 247   | Burn, sepsis      |
| 7       | Alive              | 25  | M   | Yes | <i>Alpha streptococcus</i> ,<br><i>Diphtheroids</i>                                          | 19/38      | 280   | Trauma            |
| 8       | Alive              | 69  | M   | Yes | <i>Staphylococcus aureus</i>                                                                 | 5/13       | 310   | Sepsis            |
| 9       | Alive              | 25  | M   | Yes | <i>Staphylococcus aureus</i> ,<br><i>Acinetobacter</i>                                       | 11/26      | 138   | Trauma            |
| 10      | Dead               | 79  | M   | Yes | <i>Pseudomonas aeruginosa</i>                                                                | 16/35      | 185   | Trauma            |
| 11      | Alive              | 66  | M   | Yes | <i>Staphylococcus aureus</i>                                                                 | 14/15      | 173   | Trauma            |
| 12      | Dead               | 62  | M   | Yes | <i>Staphylococcus aureus</i>                                                                 | 7/9        | 187   | Cardiogenic shock |
| 13      | Alive              | 46  | M   | Yes | <i>Streptococcus milleri</i>                                                                 | 4/21       | 141   | Trauma            |
| 14      | Dead               | 65  | M   | Yes | <i>Pseudomonas aeruginosa</i>                                                                | 12/17      | 240   | Sepsis            |
| 15      | Alive              | 70  | M   | No  | N/A                                                                                          | 18/33      | 212   | Trauma            |
| 16      | Alive              | 38  | F   | No  | N/A                                                                                          | 5/13       | 144   | Pancreatitis      |
| 17      | Alive              | 22  | M   | No  | N/A                                                                                          | 3/5        | 138   | Trauma            |
| 18      | Alive              | 20  | M   | No  | N/A                                                                                          | 10/30      | 185   | Trauma            |
| 19      | Alive              | 62  | F   | No  | N/A                                                                                          | 7/11       | 254   | Sepsis            |
| 20      | Alive              | 53  | M   | No  | N/A                                                                                          | 4/10       | 223   | Sepsis, shock     |
| 21      | Alive              | 61  | M   | No  | N/A                                                                                          | 9/15       | 208   | Sepsis            |
| 22      | Alive              | 56  | F   | No  | N/A                                                                                          | 2/5        | 250   | Sepsis            |
| 23      | Dead               | 60  | M   | No  | N/A                                                                                          | 10/25      | 220   | Cancer            |
| 24      | Alive              | 62  | F   | No  | N/A                                                                                          | 1/10       | 234   | Sepsis            |
| 25      | Alive              | 49  | M   | No  | N/A                                                                                          | 4/11       | 168   | Trauma            |
| 26      | Alive              | 59  | F   | No  | N/A                                                                                          | 6/11       | 300   | Trauma            |
| 27      | Alive              | 40  | M   | No  | N/A                                                                                          | 11/25      | 300   | Trauma            |
| 28      | Alive              | 49  | F   | No  | N/A                                                                                          | 5/17       | 183   | Sepsis            |
| 29      | Alive              | 42  | M   | No  | N/A                                                                                          | 5/35       | 170   | Burns             |
| 30      | Alive              | 25  | M   | No  | N/A                                                                                          | 13/38      | 203   | Trauma            |

\* Days on ventilator prior to bronchoscopy/total number of days on the ventilator

\*\*P/F ratio closest to time of bronchoscopy (all patients had P/F < 300 at time of ALI dx)
