# Supplementary material for: Proteomic Profiling of Bronchoalveolar Lavage Fluid in Critically Ill Patients with Ventilator-Associated Pneumonia
Source: PubMed Central journal article supplement (PMC3591362; doi:10.1371/journal.pone.0058782), 2013-03-07
Supplement: pone.0058782.s003.pdf [file pone.0058782.s003.pdf]

**Table S2.** Characteristics of patients suspected of having VAP in the validation cohort.

| <b>Subject characteristics</b>                                              | <b>VAP<sup>+</sup> (n = 7)</b> | <b>VAP<sup>-</sup> (n = 8)</b> | <b>P-value<sup>†</sup></b> |
|-----------------------------------------------------------------------------|--------------------------------|--------------------------------|----------------------------|
| Age (mean ± SD)                                                             | 48 ± 15                        | 58 ± 15                        | 0.22                       |
| Gender                                                                      | 7 male, 0 female               | 7 male, 1 female               |                            |
| Ventilator days* (mean ± SD)                                                | 9 ± 3                          | 10 ± 4                         | 0.67                       |
| P <sub>a</sub> O <sub>2</sub> /F <sub>i</sub> O <sub>2</sub> ** (mean ± SD) | 194 ± 43 mmHg                  | 243 ± 45 mmHg                  | 0.052                      |

\*Number of days on the ventilator prior to bronchoscopy

\*\*Ratio of arterial oxygen partial pressure (P<sub>a</sub>O<sub>2</sub>) to fraction of inspired oxygen (F<sub>i</sub>O<sub>2</sub>) at time of bronchoscopy

†Two-tailed t-test with unequal variance
