# Supplementary material for: Proteomic Profiling of Bronchoalveolar Lavage Fluid in Critically Ill Patients with Ventilator-Associated Pneumonia
Source: PubMed Central journal article supplement (PMC3591362; doi:10.1371/journal.pone.0058782), 2013-03-07
Supplement: pone.0058782.s004.pdf [file pone.0058782.s004.pdf]

**Table S3. BALF proteome of Control subjects with spectral counts.**

| Protein IPI | Entrez Gene ID | Gene Symbol | Control1 | Control2 | Control3 | Control4 | Control5 |
|-------------|----------------|-------------|----------|----------|----------|----------|----------|
| IPI00478003 | 2              | A2M         | 23       | 27       | 3        | 4        | 29       |
| IPI00550991 | 12             | SERPINA3    | 9        | 14       | 7        | 6        | 10       |
| IPI00027442 | 16             | AARS        | 1        | 0        | 1        | 1        | 0        |
| IPI00008485 | 48             | ACO1        | 3        | 1        | 1        | 7        | 0        |
| IPI00013808 | 81             | ACTN4       | 2        | 0        | 1        | 3        | 3        |
| IPI00032220 | 183            | AGT         | 8        | 5        | 4        | 3        | 5        |
| IPI00012007 | 191            | AHCY        | 2        | 1        | 1        | 2        | 0        |
| IPI00022431 | 197            | AHSG        | 2        | 3        | 1        | 2        | 0        |
| IPI00745872 | 213            | ALB         | 93       | 50       | 100      | 8        | 14       |
| IPI00218914 | 216            | ALDH1A1     | 13       | 8        | 12       | 24       | 22       |
| IPI00479877 | 223            | ALDH9A1     | 1        | 0        | 0        | 2        | 1        |
| IPI00465439 | 226            | ALDOA       | 6        | 3        | 0        | 1        | 1        |
| IPI00221221 | 246            | ALOX15      | 5        | 1        | 4        | 3        | 12       |
| IPI00022426 | 259            | AMBP        | 2        | 3        | 3        | 0        | 1        |
| IPI00218918 | 301            | ANXA1       | 5        | 4        | 3        | 3        | 2        |
| IPI00024095 | 306            | ANXA3       | 6        | 3        | 0        | 4        | 3        |
| IPI00793199 | 307            | ANXA4       | 6        | 0        | 1        | 5        | 7        |
| IPI00329801 | 308            | ANXA5       | 12       | 6        | 3        | 19       | 12       |
| IPI00414320 | 311            | ANXA11      | 0        | 1        | 4        | 0        | 1        |
| IPI00021841 | 335            | APOA1       | 12       | 14       | 21       | 5        | 14       |
| IPI00021854 | 336            | APOA2       | 1        | 1        | 2        | 1        | 2        |
| IPI00304273 | 337            | APOA4       | 2        | 5        | 12       | 0        | 7        |
| IPI00021842 | 348            | APOE        | 0        | 2        | 4        | 6        | 4        |
| IPI00218693 | 353            | APRT        | 2        | 2        | 1        | 1        | 0        |
| IPI00013698 | 427            | ASAH1       | 1        | 1        | 1        | 1        | 0        |
| IPI00032179 | 462            | SERPINC1    | 6        | 4        | 4        | 3        | 3        |
| IPI00289499 | 471            | ATIC        | 2        | 0        | 1        | 3        | 1        |
| IPI00019591 | 629            | CFB         | 6        | 4        | 5        | 2        | 3        |
| IPI00294158 | 644            | BLVRA       | 3        | 3        | 2        | 5        | 1        |
| IPI00291866 | 710            | SERPING1    | 19       | 1        | 1        | 1        | 1        |
| IPI00022392 | 712            | C1QA        | 2        | 2        | 0        | 4        | 0        |
| IPI00477992 | 713            | C1QB        | 5        | 3        | 2        | 4        | 3        |
| IPI00022394 | 714            | C1QC        | 6        | 3        | 2        | 3        | 2        |
| IPI00783987 | 718            | C3          | 149      | 125      | 148      | 158      | 154      |
| IPI00418163 | 721            | C4B         | 1        | 1        | 2        | 1        | 1        |
| IPI00021727 | 722            | C4BPA       | 4        | 1        | 7        | 6        | 6        |
| IPI00032291 | 727            | C5          | 7        | 7        | 16       | 14       | 1        |
| IPI00296608 | 730            | C7          | 1        | 1        | 1        | 0        | 0        |
| IPI00294395 | 732            | C8B         | 0        | 1        | 2        | 1        | 2        |
| IPI00022395 | 735            | C9          | 5        | 3        | 7        | 2        | 2        |
| IPI00011285 | 823            | CAPN1       | 2        | 0        | 4        | 9        | 3        |
| IPI00289758 | 824            | CAPN2       | 3        | 1        | 5        | 4        | 2        |
| IPI00025084 | 826            | CAPNS1      | 1        | 0        | 3        | 2        | 1        |

|             |      |          |    |    |    |    |    |
|-------------|------|----------|----|----|----|----|----|
| IPI00465352 | 828  | CAPS     | 4  | 0  | 5  | 6  | 8  |
| IPI00005969 | 829  | CAPZA1   | 1  | 0  | 1  | 2  | 0  |
| IPI00026185 | 832  | CAPZB    | 1  | 1  | 2  | 1  | 1  |
| IPI00027482 | 866  | SERPINA6 | 1  | 2  | 0  | 1  | 1  |
| IPI00295386 | 873  | CBR1     | 6  | 4  | 3  | 5  | 0  |
| IPI00027626 | 908  | CCT6A    | 1  | 0  | 1  | 1  | 0  |
| IPI00215997 | 928  | CD9      | 1  | 0  | 1  | 2  | 1  |
| IPI00418495 | 948  | CD36     | 1  | 0  | 1  | 1  | 0  |
| IPI00217766 | 950  | SCARB2   | 1  | 0  | 1  | 3  | 0  |
| IPI00297160 | 960  | CD44     | 4  | 2  | 1  | 3  | 1  |
| IPI00011302 | 966  | CD59     | 2  | 1  | 1  | 1  | 3  |
| IPI00000190 | 975  | CD81     | 2  | 1  | 1  | 1  | 2  |
| IPI00016786 | 998  | CDC42    | 3  | 2  | 3  | 3  | 1  |
| IPI00010180 | 1066 | CES1     | 2  | 2  | 0  | 2  | 0  |
| IPI00012011 | 1072 | CFL1     | 2  | 4  | 1  | 2  | 2  |
| IPI00022810 | 1075 | CTSC     | 1  | 1  | 0  | 1  | 0  |
| IPI00022977 | 1152 | CKB      | 3  | 0  | 3  | 3  | 1  |
| IPI00291262 | 1191 | CLU      | 5  | 6  | 6  | 3  | 6  |
| IPI00010896 | 1192 | CLIC1    | 4  | 4  | 2  | 6  | 3  |
| IPI00024067 | 1213 | CLTC     | 4  | 2  | 3  | 12 | 6  |
| IPI00295851 | 1315 | COPB1    | 1  | 0  | 1  | 2  | 1  |
| IPI00017601 | 1356 | CP       | 19 | 14 | 5  | 13 | 5  |
| IPI00305477 | 1469 | CST1     | 1  | 2  | 0  | 0  | 2  |
| IPI00013382 | 1470 | CST2     | 2  | 1  | 0  | 0  | 2  |
| IPI00032294 | 1472 | CST4     | 5  | 2  | 0  | 0  | 2  |
| IPI00297487 | 1512 | CTSH     | 3  | 1  | 0  | 2  | 1  |
| IPI00152418 | 1604 | CD55     | 1  | 2  | 2  | 1  | 1  |
| IPI00005721 | 1667 | DEFA1    | 12 | 3  | 5  | 3  | 12 |
| IPI00456969 | 1778 | DYNC1H1  | 3  | 1  | 5  | 13 | 5  |
| IPI00257508 | 1808 | DPYSL2   | 2  | 0  | 2  | 2  | 0  |
| IPI00292858 | 1890 | TYMP     | 5  | 5  | 3  | 6  | 3  |
| IPI00186290 | 1938 | EEF2     | 7  | 5  | 8  | 9  | 5  |
| IPI00027444 | 1992 | SERPINB1 | 9  | 5  | 3  | 8  | 0  |
| IPI00465248 | 2023 | ENO1     | 7  | 5  | 2  | 6  | 2  |
| IPI00219682 | 2040 | STOM     | 3  | 1  | 3  | 5  | 3  |
| IPI00019568 | 2147 | F2       | 3  | 3  | 6  | 0  | 0  |
| IPI00215746 | 2167 | FABP4    | 6  | 3  | 0  | 3  | 0  |
| IPI00029658 | 2202 | EFEMP1   | 2  | 1  | 1  | 1  | 2  |
| IPI00073772 | 2203 | FBP1     | 2  | 11 | 6  | 12 | 2  |
| IPI00021885 | 2243 | FGA      | 1  | 0  | 2  | 0  | 2  |
| IPI00298497 | 2244 | FGB      | 6  | 4  | 16 | 2  | 10 |
| IPI00021891 | 2266 | FGG      | 6  | 2  | 12 | 3  | 8  |
| IPI00216008 | 2539 | G6PD     | 2  | 0  | 1  | 0  | 1  |
| IPI00031461 | 2665 | GDI2     | 1  | 1  | 2  | 2  | 1  |
| IPI00215767 | 2683 | B4GALT1  | 1  | 0  | 1  | 1  | 1  |
| IPI00217906 | 2771 | GNAI2    | 2  | 2  | 4  | 5  | 3  |

|             |      |           |    |    |    |    |    |
|-------------|------|-----------|----|----|----|----|----|
| IPI00026268 | 2782 | GNB1      | 1  | 0  | 2  | 0  | 1  |
| IPI00295777 | 2819 | GPD1      | 4  | 4  | 6  | 8  | 1  |
| IPI00027497 | 2821 | GPI       | 0  | 3  | 4  | 9  | 2  |
| IPI00026314 | 2934 | GSN       | 5  | 8  | 4  | 0  | 0  |
| IPI00657682 | 2938 | GSTA1     | 2  | 2  | 4  | 1  | 5  |
| IPI00219757 | 2950 | GSTP1     | 13 | 2  | 6  | 9  | 12 |
| IPI00026272 | 3012 | HIST1H2AE | 1  | 2  | 1  | 1  | 0  |
| IPI00410714 | 3039 | HBA1      | 4  | 4  | 3  | 0  | 0  |
| IPI00654755 | 3043 | HBB       | 5  | 1  | 3  | 0  | 3  |
| IPI00292950 | 3053 | SERPIND1  | 3  | 3  | 7  | 3  | 3  |
| IPI00029739 | 3075 | CFH       | 1  | 0  | 1  | 1  | 10 |
| IPI00018246 | 3098 | HK1       | 2  | 2  | 4  | 7  | 1  |
| IPI00005118 | 3101 | HK3       | 5  | 3  | 4  | 11 | 3  |
| IPI00030023 | 3176 | HNMT      | 0  | 1  | 1  | 1  | 0  |
| IPI00216049 | 3190 | HNRNPK    | 6  | 2  | 2  | 2  | 0  |
| IPI00022488 | 3263 | HPX       | 15 | 17 | 2  | 6  | 3  |
| IPI00022371 | 3273 | HRG       | 2  | 3  | 3  | 1  | 2  |
| IPI00304925 | 3303 | HSPA1A    | 4  | 0  | 2  | 3  | 0  |
| IPI00003362 | 3309 | HSPA5     | 3  | 1  | 0  | 1  | 0  |
| IPI00025512 | 3315 | HSPB1     | 5  | 2  | 1  | 0  | 0  |
| IPI00382470 | 3320 | HSP90AA1  | 13 | 1  | 2  | 23 | 15 |
| IPI00008494 | 3383 | ICAM1     | 5  | 3  | 3  | 0  | 3  |
| IPI00027223 | 3417 | IDH1      | 5  | 6  | 7  | 5  | 6  |
| IPI00020996 | 3483 | IGFALS    | 1  | 2  | 1  | 0  | 0  |
| IPI00178926 | 3512 | IGJ       | 3  | 3  | 2  | 3  | 4  |
| IPI00103356 | 3689 | ITGB2     | 0  | 0  | 2  | 3  | 1  |
| IPI00292530 | 3697 | ITIH1     | 4  | 7  | 4  | 3  | 4  |
| IPI00305461 | 3698 | ITIH2     | 4  | 4  | 3  | 0  | 0  |
| IPI00218192 | 3700 | ITIH4     | 2  | 4  | 3  | 0  | 2  |
| IPI00012837 | 3799 | KIF5B     | 2  | 0  | 1  | 1  | 0  |
| IPI00001639 | 3837 | KPNB1     | 1  | 0  | 1  | 3  | 1  |
| IPI00220327 | 3848 | KRT1      | 22 | 8  | 13 | 16 | 14 |
| IPI00019359 | 3857 | KRT9      | 7  | 4  | 6  | 8  | 7  |
| IPI00009865 | 3858 | KRT10     | 2  | 0  | 13 | 1  | 14 |
| IPI00010471 | 3936 | LCP1      | 25 | 29 | 14 | 29 | 8  |
| IPI00219217 | 3945 | LDHB      | 9  | 7  | 7  | 12 | 8  |
| IPI00219219 | 3956 | LGALS1    | 1  | 0  | 1  | 2  | 0  |
| IPI00023673 | 3959 | LGALS3BP  | 1  | 2  | 1  | 3  | 2  |
| IPI00219077 | 4048 | LTA4H     | 1  | 1  | 1  | 1  | 1  |
| IPI00298860 | 4057 | LTF       | 1  | 1  | 0  | 0  | 1  |
| IPI00019038 | 4069 | LYZ       | 1  | 2  | 0  | 0  | 2  |
| IPI00291005 | 4190 | MDH1      | 7  | 5  | 7  | 9  | 2  |
| IPI00027848 | 4360 | MRC1      | 15 | 16 | 1  | 11 | 5  |
| IPI00219365 | 4478 | MSN       | 24 | 19 | 22 | 23 | 12 |
| IPI00019502 | 4627 | MYH9      | 12 | 7  | 11 | 27 | 3  |
| IPI00306960 | 4677 | NARS      | 1  | 1  | 0  | 3  | 1  |

|             |      |          |    |    |    |    |    |
|-------------|------|----------|----|----|----|----|----|
| IPI00000874 | 5052 | PRDX1    | 2  | 2  | 3  | 4  | 3  |
| IPI00016610 | 5093 | PCBP1    | 1  | 0  | 1  | 1  | 1  |
| IPI00006114 | 5176 | SERPINF1 | 7  | 7  | 4  | 4  | 3  |
| IPI00216691 | 5216 | PFN1     | 5  | 6  | 3  | 4  | 3  |
| IPI00219525 | 5226 | PGD      | 6  | 5  | 6  | 9  | 8  |
| IPI00169383 | 5230 | PGK1     | 9  | 5  | 6  | 7  | 5  |
| IPI00219526 | 5236 | PGM1     | 5  | 2  | 1  | 0  | 0  |
| IPI00553177 | 5265 | SERPINA1 | 15 | 24 | 21 | 1  | 1  |
| IPI00328609 | 5267 | SERPINA4 | 1  | 1  | 2  | 0  | 0  |
| IPI00413451 | 5269 | SERPINB6 | 6  | 3  | 5  | 5  | 4  |
| IPI00004573 | 5284 | PIGR     | 52 | 33 | 15 | 45 | 32 |
| IPI00022974 | 5304 | PIP      | 2  | 2  | 0  | 1  | 4  |
| IPI00847989 | 5315 | PKM2     | 2  | 0  | 4  | 3  | 1  |
| IPI00019580 | 5340 | PLG      | 1  | 2  | 1  | 0  | 0  |
| IPI00008164 | 5550 | PREP     | 1  | 0  | 1  | 1  | 0  |
| IPI00294004 | 5627 | PROS1    | 1  | 0  | 0  | 1  | 1  |
| IPI00012503 | 5660 | PSAP     | 1  | 1  | 1  | 3  | 1  |
| IPI00479722 | 5720 | PSME1    | 3  | 1  | 1  | 3  | 0  |
| IPI00384051 | 5721 | PSME2    | 3  | 1  | 0  | 2  | 0  |
| IPI00003590 | 5768 | QSOX1    | 2  | 5  | 0  | 7  | 4  |
| IPI00783313 | 5836 | PYGL     | 3  | 1  | 0  | 5  | 0  |
| IPI00550069 | 6050 | RNH1     | 2  | 6  | 12 | 15 | 8  |
| IPI00642211 | 6051 | RNPEP    | 5  | 0  | 3  | 8  | 3  |
| IPI00032313 | 6275 | S100A4   | 1  | 1  | 2  | 2  | 1  |
| IPI00027463 | 6277 | S100A6   | 0  | 0  | 6  | 4  | 3  |
| IPI00007047 | 6279 | S100A8   | 4  | 2  | 2  | 3  | 6  |
| IPI00027462 | 6280 | S100A9   | 4  | 1  | 1  | 2  | 3  |
| IPI00013895 | 6282 | S100A11  | 1  | 1  | 3  | 5  | 3  |
| IPI00022204 | 6317 | SERPINB3 | 1  | 1  | 0  | 1  | 3  |
| IPI00296083 | 6439 | SFTPB    | 36 | 27 | 46 | 45 | 22 |
| IPI00291878 | 6441 | SFTPD    | 6  | 5  | 5  | 3  | 4  |
| IPI00299095 | 6643 | SNX2     | 0  | 1  | 1  | 2  | 0  |
| IPI00030781 | 6772 | STAT1    | 2  | 0  | 2  | 1  | 0  |
| IPI00744692 | 6888 | TALDO1   | 1  | 2  | 0  | 1  | 2  |
| IPI00292946 | 6906 | SERPINA7 | 3  | 1  | 2  | 0  | 0  |
| IPI00022463 | 7018 | TF       | 43 | 38 | 19 | 14 | 18 |
| IPI00022462 | 7037 | TFRC     | 5  | 3  | 3  | 8  | 1  |
| IPI00018219 | 7045 | TGFBI    | 6  | 5  | 2  | 2  | 1  |
| IPI00218251 | 7052 | TGM2     | 7  | 5  | 11 | 2  | 4  |
| IPI00643920 | 7086 | TKT      | 3  | 2  | 2  | 2  | 1  |
| IPI00298994 | 7094 | TLN1     | 7  | 4  | 8  | 8  | 1  |
| IPI00022432 | 7276 | TTR      | 1  | 5  | 6  | 1  | 2  |
| IPI00026119 | 7317 | UBA1     | 4  | 2  | 7  | 8  | 6  |
| IPI00006705 | 7356 | SCGB1A1  | 3  | 0  | 1  | 1  | 0  |
| IPI00031420 | 7358 | UGDH     | 0  | 1  | 1  | 0  | 3  |
| IPI00329331 | 7360 | UGP2     | 2  | 1  | 3  | 3  | 2  |

|             |       |           |   |    |    |    |    |
|-------------|-------|-----------|---|----|----|----|----|
| IPI00022774 | 7415  | VCP       | 9 | 4  | 3  | 9  | 5  |
| IPI00418471 | 7431  | VIM       | 3 | 11 | 19 | 53 | 22 |
| IPI00298971 | 7448  | VTN       | 3 | 0  | 5  | 1  | 2  |
| IPI00295400 | 7453  | WARS      | 3 | 2  | 3  | 7  | 3  |
| IPI00021263 | 7534  | YWHAZ     | 1 | 1  | 0  | 1  | 1  |
| IPI00016342 | 7879  | RAB7A     | 1 | 0  | 2  | 3  | 0  |
| IPI00024664 | 8078  | USP5      | 1 | 0  | 0  | 1  | 1  |
| IPI00453473 | 8294  | HIST1H4I  | 2 | 0  | 2  | 2  | 1  |
| IPI00003935 | 8349  | HIST2H2BE | 1 | 0  | 2  | 3  | 0  |
| IPI00550363 | 8407  | TAGLN2    | 7 | 7  | 1  | 3  | 3  |
| IPI00013004 | 8566  | PDXK      | 0 | 0  | 1  | 3  | 1  |
| IPI00305978 | 8574  | AKR7A2    | 0 | 0  | 1  | 1  | 1  |
| IPI00029012 | 8661  | EIF3A     | 1 | 0  | 0  | 1  | 1  |
| IPI00009342 | 8826  | IQGAP1    | 9 | 6  | 9  | 29 | 5  |
| IPI00242956 | 8857  | FCGBP     | 2 | 8  | 0  | 10 | 2  |
| IPI00012303 | 8991  | SELENBP1  | 4 | 1  | 0  | 4  | 1  |
| IPI00020436 | 9230  | RAB11B    | 1 | 0  | 1  | 2  | 0  |
| IPI00014055 | 9476  | NAPSA     | 5 | 6  | 4  | 6  | 4  |
| IPI00026216 | 9520  | NPEPPS    | 1 | 0  | 1  | 3  | 2  |
| IPI00220301 | 9588  | PRDX6     | 7 | 4  | 2  | 4  | 3  |
| IPI00000105 | 9961  | MVP       | 0 | 0  | 1  | 1  | 1  |
| IPI00246058 | 10015 | PDCD6IP   | 6 | 2  | 6  | 3  | 2  |
| IPI00005160 | 10095 | ARPC1B    | 2 | 2  | 2  | 3  | 1  |
| IPI00028091 | 10096 | ACTR3     | 3 | 4  | 4  | 9  | 2  |
| IPI00030936 | 10103 | TSPAN1    | 1 | 0  | 1  | 2  | 2  |
| IPI00005161 | 10109 | ARPC2     | 1 | 2  | 2  | 6  | 0  |
| IPI00018873 | 10135 | NAMPT     | 0 | 1  | 1  | 3  | 1  |
| IPI00641950 | 10399 | GNB2L1    | 0 | 1  | 2  | 3  | 1  |
| IPI00008274 | 10487 | CAP1      | 2 | 2  | 5  | 0  | 0  |
| IPI00156689 | 10493 | VAT1      | 2 | 5  | 2  | 3  | 0  |
| IPI00018451 | 10519 | CIB1      | 2 | 1  | 2  | 1  | 3  |
| IPI00007910 | 10568 | SLC34A2   | 5 | 1  | 1  | 7  | 3  |
| IPI00018465 | 10574 | CCT7      | 1 | 0  | 1  | 1  | 2  |
| IPI00302927 | 10575 | CCT4      | 3 | 0  | 1  | 3  | 2  |
| IPI00297779 | 10576 | CCT2      | 4 | 1  | 1  | 1  | 1  |
| IPI00302925 | 10694 | CCT8      | 2 | 1  | 2  | 1  | 0  |
| IPI00009104 | 10856 | RUVBL2    | 1 | 0  | 1  | 1  | 3  |
| IPI00010720 | 22948 | CCT5      | 1 | 0  | 1  | 2  | 1  |
| IPI00017704 | 23406 | COTL1     | 1 | 6  | 1  | 4  | 0  |
| IPI00029997 | 25796 | PGLS      | 2 | 0  | 2  | 2  | 0  |
| IPI00024915 | 25824 | PRDX5     | 3 | 2  | 2  | 0  | 3  |
| IPI00294739 | 25939 | SAMHD1    | 1 | 1  | 2  | 6  | 1  |
| IPI00419237 | 51056 | LAP3      | 5 | 3  | 1  | 2  | 0  |
| IPI00009856 | 51297 | PLUNC     | 3 | 0  | 0  | 1  | 7  |
| IPI00219953 | 51727 | CMPK1     | 0 | 1  | 1  | 1  | 2  |
| IPI00147874 | 54187 | NANS      | 1 | 0  | 0  | 1  | 1  |

|             |        |           |    |    |    |    |    |
|-------------|--------|-----------|----|----|----|----|----|
| IPI00451624 | 55118  | CRTAC1    | 8  | 8  | 1  | 2  | 3  |
| IPI00296526 | 55577  | NAGK      | 1  | 0  | 2  | 1  | 0  |
| IPI00000581 | 55611  | OTUB1     | 3  | 0  | 1  | 1  | 1  |
| IPI00018931 | 55737  | VPS35     | 2  | 0  | 2  | 7  | 2  |
| IPI00100160 | 55832  | CAND1     | 4  | 0  | 0  | 3  | 1  |
| IPI00021302 | 56241  | SUSD2     | 8  | 3  | 4  | 2  | 3  |
| IPI00007058 | 57175  | CORO1B    | 1  | 2  | 1  | 0  | 0  |
| IPI00456750 | 64855  | FAM129B   | 2  | 0  | 1  | 0  | 1  |
| IPI00296654 | 80341  | BPIL1     | 5  | 3  | 1  | 3  | 5  |
| IPI00216699 | 83706  | FERMT3    | 4  | 2  | 5  | 13 | 1  |
| IPI00066193 | 92304  | SCGB3A1   | 2  | 3  | 3  | 1  | 2  |
| IPI00291410 | 92747  | C20orf114 | 5  | 28 | 3  | 19 | 45 |
| IPI00296353 | 93663  | ARHGAP18  | 3  | 0  | 3  | 0  | 1  |
| IPI00033494 | 103910 | MRLC2     | 1  | 0  | 1  | 1  | 0  |
| IPI00163207 | 114770 | PGLYRP2   | 2  | 4  | 1  | 0  | 0  |
| IPI00060715 | 115207 | KCTD12    | 2  | 0  | 0  | 3  | 1  |
| IPI00328350 | 116496 | FAM129A   | 3  | 1  | 1  | 3  | 1  |
| IPI00060800 | 124220 | LOC124220 | 4  | 1  | 0  | 3  | 5  |
| IPI00304557 | 140683 | C20orf70  | 3  | 1  | 0  | 0  | 4  |
| IPI00166766 | 146556 | MGC45438  | 2  | 2  | 0  | 0  | 1  |
| IPI00163563 | 157310 | PEBP4     | 2  | 0  | 2  | 0  | 1  |
| IPI00374315 | 352999 | C6orf58   | 5  | 2  | 0  | 1  | 6  |
| IPI00012889 | 653509 | SFTPA1    | 5  | 3  | 8  | 7  | 4  |
| IPI00855918 | 727897 | MUC5B     | 45 | 27 | 18 | 45 | 10 |
