# Supplementary material for: Proteomic Profiling of Bronchoalveolar Lavage Fluid in Critically Ill Patients with Ventilator-Associated Pneumonia
Source: PubMed Central journal article supplement (PMC3591362; doi:10.1371/journal.pone.0058782), 2013-03-07
Supplement: pone.0058782.s005.pdf [file pone.0058782.s005.pdf]

**Table S4. Differential BALF protein expression between Controls and ALI patients. Significance was based on Spectral Index (SI) analysis. Positive SI indicates increased abundance in ALI whereas negative SI corresponds to increased protein abundance in Control BALF samples.**

| <b>Protein IPI</b> | <b>Entrez Gene ID</b> | <b>Gene Symbol</b> | <b>Spectral Index</b> | <b>Mean Control Spectral Count</b> | <b>Mean ALI Spectral Count</b> |
|--------------------|-----------------------|--------------------|-----------------------|------------------------------------|--------------------------------|
| IPI00021439        | 60                    | ACTB               | 1.000                 | 0.0                                | 174.9                          |
| IPI00414676        | 3326                  | HSP90AB1           | 1.000                 | 0.0                                | 11.8                           |
| IPI00746388        | 7430                  | EZR                | 1.000                 | 0.0                                | 12.0                           |
| IPI00739237        | 653879                | LOC653879          | 1.000                 | 0.0                                | 96.1                           |
| IPI00021885        | 2243                  | FGA                | 0.986                 | 1.0                                | 112.8                          |
| IPI00012889        | 653509                | SFTPA1             | 0.986                 | 5.4                                | 755.1                          |
| IPI00013508        | 87                    | ACTN1              | 0.967                 | 0.0                                | 20.9                           |
| IPI00215914        | 375                   | ARF1               | 0.967                 | 0.0                                | 3.3                            |
| IPI00032258        | 720                   | C4A                | 0.967                 | 0.0                                | 126.9                          |
| IPI00219018        | 2597                  | GAPDH              | 0.967                 | 0.0                                | 21.7                           |
| IPI00217966        | 3939                  | LDHA               | 0.967                 | 0.0                                | 14.0                           |
| IPI00103397        | 4586                  | MUC5AC             | 0.967                 | 0.0                                | 31.1                           |
| IPI00789605        | 4637                  | MYL6               | 0.967                 | 0.0                                | 4.7                            |
| IPI00552578        | 6288                  | SAA1               | 0.967                 | 0.0                                | 8.2                            |
| IPI00099110        | 1755                  | DMBT1              | 0.934                 | 1.0                                | 17.2                           |
| IPI00418169        | 302                   | ANXA2              | 0.933                 | 0.0                                | 11.1                           |
| IPI00013955        | 4582                  | MUC1               | 0.933                 | 0.0                                | 2.8                            |
| IPI00745872        | 213                   | ALB                | 0.932                 | 53.0                               | 1506.7                         |
| IPI00027462        | 6280                  | S100A9             | 0.932                 | 2.2                                | 62.4                           |
| IPI00003865        | 3312                  | HSPA8              | 0.930                 | 0.6                                | 9.6                            |
| IPI00302592        | 2316                  | FLNA               | 0.925                 | 0.2                                | 26.4                           |
| IPI00005159        | 10097                 | ACTR2              | 0.900                 | 0.0                                | 8.5                            |
| IPI00455174        | 57186                 | C20orf74           | 0.900                 | 0.0                                | 2.9                            |
| IPI00166768        | 84790                 | TUBA1C             | 0.900                 | 0.0                                | 1.8                            |
| IPI00011654        | 203068                | TUBB               | 0.900                 | 0.0                                | 4.6                            |
| IPI00000816        | 7531                  | YWHAE              | 0.899                 | 0.2                                | 6.4                            |
| IPI00219077        | 4048                  | LTA4H              | 0.891                 | 1.0                                | 25.0                           |
| IPI00007047        | 6279                  | S100A8             | 0.880                 | 3.4                                | 53.3                           |
| IPI00021263        | 7534                  | YWHAZ              | 0.870                 | 0.8                                | 10.3                           |
| IPI00022229        | 338                   | APOB               | 0.867                 | 0.0                                | 25.2                           |
| IPI00025447        | 1915                  | EEF1A1             | 0.867                 | 0.0                                | 13.3                           |
| IPI00216318        | 7529                  | YWHAB              | 0.867                 | 0.0                                | 5.8                            |
| IPI00298497        | 2244                  | FGB                | 0.865                 | 7.6                                | 104.6                          |
| IPI00010133        | 11151                 | CORO1A             | 0.862                 | 0.4                                | 13.3                           |
| IPI00021891        | 2266                  | FGG                | 0.849                 | 6.2                                | 75.8                           |
| IPI00298860        | 4057                  | LTF                | 0.846                 | 0.6                                | 41.5                           |
| IPI00431645        | 3240                  | HP                 | 0.840                 | 0.6                                | 23.1                           |
| IPI00783313        | 5836                  | PYGL               | 0.834                 | 1.8                                | 19.5                           |
| IPI00179330        | 6233                  | RPS27A             | 0.833                 | 0.0                                | 2.2                            |
| IPI00654755        | 3043                  | HBB                | 0.832                 | 2.4                                | 38.7                           |
| IPI00643920        | 7086                  | TKT                | 0.826                 | 2.0                                | 21.0                           |
| IPI00554811        | 10093                 | ARPC4              | 0.822                 | 0.4                                | 6.2                            |

|             |        |           |       |      |       |
|-------------|--------|-----------|-------|------|-------|
| IPI00555812 | 2638   | GC        | 0.817 | 0.4  | 9.9   |
| IPI00218646 | 1536   | CYBB      | 0.815 | 0.4  | 5.7   |
| IPI00028064 | 1511   | CTSG      | 0.803 | 0.2  | 6.6   |
| IPI00478231 | 387    | RHOA      | 0.800 | 0.0  | 3.5   |
| IPI00021304 | 3849   | KRT2      | 0.800 | 0.0  | 3.9   |
| IPI00022429 | 5004   | ORM1      | 0.800 | 0.0  | 2.7   |
| IPI00027230 | 7184   | HSP90B1   | 0.800 | 0.4  | 4.0   |
| IPI00220642 | 7532   | YWHAG     | 0.800 | 0.0  | 3.1   |
| IPI00797709 | 23603  | CORO1C    | 0.800 | 0.0  | 2.2   |
| IPI00216008 | 2539   | G6PD      | 0.798 | 0.8  | 11.0  |
| IPI00453473 | 8294   | HIST1H4I  | 0.795 | 1.4  | 16.2  |
| IPI00002459 | 309    | ANXA6     | 0.792 | 0.4  | 11.4  |
| IPI00553177 | 5265   | SERPINA1  | 0.780 | 12.4 | 100.5 |
| IPI00003935 | 8349   | HIST2H2BE | 0.780 | 1.2  | 7.5   |
| IPI00000105 | 9961   | MVP       | 0.770 | 0.6  | 6.3   |
| IPI00013808 | 81     | ACTN4     | 0.770 | 1.8  | 12.3  |
| IPI00168728 | 3507   | IGHM      | 0.767 | 0.0  | 2.3   |
| IPI00217987 | 3684   | ITGAM     | 0.767 | 0.0  | 9.3   |
| IPI00027423 | 5499   | PPP1CA    | 0.767 | 0.0  | 1.3   |
| IPI00171611 | 126961 | HIST2H3C  | 0.767 | 0.0  | 6.6   |
| IPI00410714 | 3039   | HBA1      | 0.765 | 2.2  | 22.2  |
| IPI00019502 | 4627   | MYH9      | 0.735 | 12.0 | 78.5  |
| IPI00004656 | 567    | B2M       | 0.733 | 0.0  | 1.8   |
| IPI00026781 | 2194   | FASN      | 0.733 | 0.0  | 7.4   |
| IPI00032311 | 3929   | LBP       | 0.733 | 0.0  | 9.6   |
| IPI00299024 | 10409  | BASP1     | 0.733 | 0.0  | 2.3   |
| IPI00007244 | 4353   | MPO       | 0.724 | 0.6  | 15.7  |
| IPI00025491 | 1973   | EIF4A1    | 0.722 | 0.6  | 3.8   |
| IPI00419585 | 5478   | PPIA      | 0.715 | 0.2  | 3.5   |
| IPI00478003 | 2      | A2M       | 0.712 | 17.2 | 115.7 |
| IPI00291175 | 7414   | VCL       | 0.710 | 0.8  | 5.7   |
| IPI00291410 | 92747  | C20orf114 | 0.701 | 20.0 | 113.8 |
| IPI00018873 | 10135  | NAMPT     | 0.686 | 1.2  | 7.2   |
| IPI00218918 | 301    | ANXA1     | 0.672 | 3.4  | 19.3  |
| IPI00219038 | 3020   | H3F3A     | 0.667 | 0.0  | 2.7   |
| IPI00216319 | 7533   | YWHAH     | 0.667 | 0.0  | 1.9   |
| IPI00004524 | 25801  | GCA       | 0.667 | 0.0  | 4.0   |
| IPI00298971 | 7448   | VTN       | 0.657 | 2.2  | 11.6  |
| IPI00304925 | 3303   | HSPA1A    | 0.650 | 1.8  | 7.9   |
| IPI00008274 | 10487  | CAP1      | 0.646 | 1.8  | 7.0   |
| IPI00022389 | 1401   | CRP       | 0.633 | 0.0  | 3.2   |
| IPI00027769 | 1991   | ELA2      | 0.633 | 0.0  | 7.2   |
| IPI00027509 | 4318   | MMP9      | 0.633 | 0.0  | 6.7   |
| IPI00010796 | 5034   | P4HB      | 0.633 | 0.0  | 3.9   |
| IPI00019580 | 5340   | PLG       | 0.631 | 0.8  | 9.6   |
| IPI00168184 | 5518   | PPP2R1A   | 0.627 | 0.6  | 3.6   |
| IPI00299547 | 3934   | LCN2      | 0.617 | 1.2  | 4.9   |
| IPI00305461 | 3698   | ITIH2     | 0.616 | 2.2  | 22.8  |

|             |        |          |        |     |      |
|-------------|--------|----------|--------|-----|------|
| IPI00026314 | 2934   | GSN      | 0.612  | 3.4 | 11.6 |
| IPI00003817 | 397    | ARHGDI B | 0.605  | 0.2 | 2.6  |
| IPI00183046 | 5777   | PTPN6    | 0.605  | 0.8 | 4.1  |
| IPI00641229 | 3494   | IGHA2    | 0.600  | 0.0 | 1.9  |
| IPI00255052 | 4715   | NDUFB9   | 0.600  | 0.0 | 0.8  |
| IPI00003909 | 6515   | SLC2A3   | 0.600  | 0.0 | 2.2  |
| IPI00016513 | 10890  | RAB10    | 0.600  | 0.0 | 0.7  |
| IPI00165579 | 55748  | CNDP2    | 0.600  | 0.0 | 3.0  |
| IPI00021854 | 336    | APOA2    | 0.589  | 1.4 | 8.0  |
| IPI00025084 | 826    | CAPNS1   | 0.588  | 1.4 | 5.1  |
| IPI00029739 | 3075   | CFH      | 0.588  | 2.6 | 12.9 |
| IPI00155168 | 5788   | PTPRC    | 0.577  | 0.2 | 2.8  |
| IPI00218319 | 7170   | TPM3     | 0.576  | 0.8 | 2.8  |
| IPI00219682 | 2040   | STOM     | 0.572  | 3.0 | 12.0 |
| IPI00022395 | 735    | C9       | 0.570  | 3.8 | 20.1 |
| IPI00384051 | 5721   | PSME2    | 0.570  | 1.2 | 3.9  |
| IPI00010779 | 7171   | TPM4     | 0.569  | 0.2 | 2.4  |
| IPI00552280 | 671    | BPI      | 0.567  | 0.0 | 6.0  |
| IPI00000875 | 1937   | EEF1G    | 0.567  | 0.0 | 1.2  |
| IPI00892671 | 3500   | IGHG1    | 0.567  | 0.0 | 1.4  |
| IPI00029863 | 5345   | SERPINF2 | 0.567  | 0.0 | 2.2  |
| IPI00293925 | 8547   | FCN3     | 0.567  | 0.0 | 1.5  |
| IPI00012500 | 83990  | BRIP1    | 0.567  | 0.0 | 2.0  |
| IPI00796878 | 94160  | ABCC12   | 0.567  | 0.0 | 5.1  |
| IPI00879709 | 729    | C6       | 0.563  | 0.2 | 4.1  |
| IPI00298994 | 7094   | TLN1     | 0.561  | 5.6 | 23.5 |
| IPI00014338 | 4689   | NCF4     | 0.558  | 0.2 | 1.4  |
| IPI00216256 | 9948   | WDR1     | 0.556  | 1.4 | 4.3  |
| IPI00847989 | 5315   | PKM2     | 0.554  | 2.0 | 7.8  |
| IPI00296353 | 93663  | ARHGAP18 | -0.495 | 1.4 | 0.2  |
| IPI00294158 | 644    | BLVRA    | -0.498 | 2.8 | 1.6  |
| IPI00022974 | 5304   | PIP      | -0.508 | 1.8 | 0.6  |
| IPI00060715 | 115207 | KCTD12   | -0.530 | 1.2 | 0.1  |
| IPI00022432 | 7276   | TTR      | -0.538 | 3.0 | 1.5  |
| IPI00000874 | 5052   | PRDX1    | -0.541 | 2.8 | 1.4  |
| IPI00006114 | 5176   | SERPINF1 | -0.543 | 5.0 | 2.0  |
| IPI00479877 | 223    | ALDH9A1  | -0.549 | 0.8 | 0.1  |
| IPI00010180 | 1066   | CES1     | -0.549 | 1.2 | 0.1  |
| IPI00163563 | 157310 | PEBP4    | -0.558 | 1.0 | 0.1  |
| IPI00008164 | 5550   | PREP     | -0.567 | 0.6 | 0.0  |
| IPI00744692 | 6888   | TALDO1   | -0.568 | 1.2 | 0.3  |
| IPI00031420 | 7358   | UGDH     | -0.580 | 1.0 | 0.0  |
| IPI00419237 | 51056  | LAP3     | -0.596 | 2.2 | 0.5  |
| IPI00022810 | 1075   | CTSC     | -0.600 | 0.6 | 0.0  |
| IPI00305477 | 1469   | CST1     | -0.600 | 1.0 | 0.0  |
| IPI00013382 | 1470   | CST2     | -0.600 | 1.0 | 0.0  |
| IPI00032294 | 1472   | CST4     | -0.600 | 1.8 | 0.0  |
| IPI00257508 | 1808   | DPYSL2   | -0.600 | 1.2 | 0.0  |

|             |        |          |        |     |     |
|-------------|--------|----------|--------|-----|-----|
| IPI00215746 | 2167   | FABP4    | -0.600 | 2.4 | 0.0 |
| IPI00292946 | 6906   | SERPINA7 | -0.600 | 1.2 | 0.0 |
| IPI00020436 | 9230   | RAB11B   | -0.600 | 0.8 | 0.0 |
| IPI00304557 | 140683 | C20orf70 | -0.600 | 1.6 | 0.0 |
| IPI00220301 | 9588   | PRDX6    | -0.610 | 4.0 | 1.4 |
| IPI00295386 | 873    | CBR1     | -0.632 | 3.6 | 0.7 |
| IPI00022488 | 3263   | HPX      | -0.635 | 8.6 | 2.9 |
| IPI00374315 | 352999 | C6orf58  | -0.675 | 2.8 | 0.4 |
| IPI00291005 | 4190   | MDH1     | -0.708 | 6.0 | 1.5 |
| IPI00032179 | 462    | SERPINC1 | -0.713 | 4.0 | 1.0 |
| IPI00008485 | 48     | ACO1     | -0.726 | 2.4 | 0.2 |
| IPI00017704 | 23406  | COTL1    | -0.733 | 2.4 | 0.2 |
| IPI00021302 | 56241  | SUSD2    | -0.735 | 4.0 | 0.9 |
| IPI00018246 | 3098   | HK1      | -0.758 | 3.2 | 0.7 |
| IPI00009104 | 10856  | RUVBL2   | -0.777 | 1.2 | 0.0 |
| IPI00027482 | 866    | SERPINA6 | -0.800 | 1.0 | 0.0 |
| IPI00297487 | 1512   | CTSH     | -0.800 | 1.4 | 0.0 |
| IPI00215767 | 2683   | B4GALT1  | -0.800 | 0.8 | 0.0 |
| IPI00012303 | 8991   | SELENBP1 | -0.800 | 2.0 | 0.0 |
| IPI00302925 | 10694  | CCT8     | -0.800 | 1.2 | 0.0 |
| IPI00022462 | 7037   | TFRC     | -0.805 | 4.0 | 0.7 |
| IPI00011302 | 966    | CD59     | -0.838 | 1.6 | 0.3 |
| IPI00413451 | 5269   | SERPINB6 | -0.945 | 4.6 | 0.2 |
| IPI00027848 | 4360   | MRC1     | -0.962 | 9.6 | 0.3 |
