# Supplementary material for: Proteomic Profiling of Bronchoalveolar Lavage Fluid in Critically Ill Patients with Ventilator-Associated Pneumonia
Source: PubMed Central journal article supplement (PMC3591362; doi:10.1371/journal.pone.0058782), 2013-03-07
Supplement: pone.0058782.s006.pdf [file pone.0058782.s006.pdf]

**Table S5. BALF proteome of ALI patients with and without VAP. Differentially enriched proteins in VAP(+) patients are highlighted in red and those more abundant in VAP(-) subjects are in blue. Significance was based on Spectral Index (SI) analysis (absolute value cutoff  $\geq 0.417$ ).**

| Protein IPI | Entrez Gene ID | Gene Symbol | Description                                                           | SI    |
|-------------|----------------|-------------|-----------------------------------------------------------------------|-------|
| IPI00027769 | 1991           | ELA2        | elastase 2, neutrophil                                                | 0.698 |
| IPI00332371 | 5211           | PFKL        | phosphofructokinase, liver                                            | 0.692 |
| IPI00022975 | 241            | ALOX5AP     | arachidonate 5-lipoxygenase-activating protein                        | 0.662 |
| IPI00020984 | 821            | CANX        | calnexin                                                              | 0.649 |
| IPI00003817 | 397            | ARHGDI3     | Rho GDP dissociation inhibitor (GDI) beta                             | 0.648 |
| IPI00007244 | 4353           | MPO         | myeloperoxidase                                                       | 0.627 |
| IPI00552280 | 671            | BPI         | bactericidal/permeability-increasing protein                          | 0.625 |
| IPI00218433 | 1535           | CYBA        | cytochrome b-245, alpha polypeptide                                   | 0.613 |
| IPI00217987 | 3684           | ITGAM       | integrin, alpha M (complement component 3 receptor 3 subunit)         | 0.604 |
| IPI00009856 | 51297          | PLUNC       | palate, lung and nasal epithelium associated                          | 0.604 |
| IPI00027509 | 4318           | MMP9        | matrix metalloproteinase 9                                            | 0.595 |
| IPI00218916 | 240            | ALOX5       | arachidonate 5-lipoxygenase                                           | 0.586 |
| IPI00103356 | 3689           | ITGB2       | integrin, beta 2 (complement component 3 receptor 3 and 4 subunit)    | 0.584 |
| IPI00025252 | 2923           | PDIA3       | protein disulfide isomerase family A, member 3                        | 0.580 |
| IPI00654777 | 8665           | EIF3F       | eukaryotic translation initiation factor 3, subunit F                 | 0.578 |
| IPI00007047 | 6279           | S100A8      | S100 calcium binding protein A8                                       | 0.575 |
| IPI00020210 | 8291           | DYSF        | dysferlin, limb girdle muscular dystrophy 2B (autosomal recessive)    | 0.571 |
| IPI00021926 | 5706           | PSMC6       | proteasome (prosome, macropain) 26S subunit, ATPase, 6                | 0.571 |
| IPI00102685 | 91663          | MYADM       | myeloid-associated differentiation marker                             | 0.571 |
| IPI00298860 | 4057           | LTF         | lactotransferrin                                                      | 0.568 |
| IPI00292532 | 820            | CAMP        | cathelicidin antimicrobial peptide                                    | 0.568 |
| IPI00000875 | 1937           | EEF1G       | eukaryotic translation elongation factor 1 gamma                      | 0.554 |
| IPI00221091 | 6210           | RPS15A      | ribosomal protein S15a                                                | 0.550 |
| IPI00216691 | 5216           | PFN1        | profilin 1                                                            | 0.546 |
| IPI00030872 | 8875           | VNN2        | vanin 2                                                               | 0.543 |
| IPI00003269 | 345651         | ACTBL2      | actin, beta-like 2                                                    | 0.542 |
| IPI00027462 | 6280           | S100A9      | S100 calcium binding protein A9                                       | 0.540 |
| IPI00783313 | 5836           | PYGL        | phosphorylase, glycogen                                               | 0.539 |
| IPI00003909 | 6515           | SLC2A3      | solute carrier family 2 (facilitated glucose transporter), member 3   | 0.533 |
| IPI00004524 | 25801          | GCA         | grancalcin, EF-hand calcium binding protein                           | 0.530 |
| IPI00027423 | 5499           | PPP1CA      | protein phosphatase 1, catalytic subunit, alpha isoform               | 0.526 |
| IPI00011454 | 23193          | GANAB       | glucosidase, alpha; neutral AB                                        | 0.524 |
| IPI00295851 | 1315           | COPB1       | coatamer protein complex, subunit beta 1                              | 0.521 |
| IPI00296635 | 2632           | GBE1        | glucan (1,4-alpha-), branching enzyme 1                               | 0.514 |
| IPI00220219 | 9276           | COPB2       | coatamer protein complex, subunit beta 2 (beta prime)                 | 0.504 |
| IPI00020618 | 8369           | HIST1H4G    | histone cluster 1, H4g                                                | 0.500 |
| IPI00022255 | 10562          | OLFM4       | olfactomedin 4                                                        | 0.497 |
| IPI00027409 | 5657           | PRTN3       | proteinase 3                                                          | 0.496 |
| IPI00007750 | 7277           | TUBA4A      | tubulin, alpha 4a                                                     | 0.485 |
| IPI00016610 | 5093           | PCBP1       | poly(rC) binding protein 1                                            | 0.483 |
| IPI00012728 | 2180           | ACSL1       | acyl-CoA synthetase long-chain family member 1                        | 0.479 |
| IPI00024067 | 1213           | CLTC        | clathrin, heavy chain (Hc)                                            | 0.474 |
| IPI00013508 | 87             | ACTN1       | actinin, alpha 1                                                      | 0.460 |
| IPI00028064 | 1511           | CTSG        | cathepsin G                                                           | 0.456 |
| IPI00027497 | 2821           | GPI         | glucose phosphate isomerase                                           | 0.456 |
| IPI00008380 | 5515           | PPP2CA      | protein phosphatase 2 (formerly 2A), catalytic subunit, alpha isoform | 0.455 |
| IPI00744706 | 6709           | SPTAN1      | spectrin, alpha, non-erythrocytic 1 (alpha-fodrin)                    | 0.453 |
| IPI00021290 | 47             | ACLY        | ATP citrate lyase                                                     | 0.451 |
| IPI00413587 | 637            | BID         | BH3 interacting domain death agonist                                  | 0.450 |
| IPI00010796 | 5034           | P4HB        | procollagen-proline, 2-oxoglutarate 4-dioxygenase, beta polypeptide   | 0.450 |
| IPI00021428 | 58             | ACTA1       | actin, alpha 1, skeletal muscle                                       | 0.448 |
| IPI00297444 | 57126          | CD177       | CD177 molecule                                                        | 0.446 |
| IPI00242956 | 8857           | FCGBP       | Fc fragment of IgG binding protein                                    | 0.445 |
| IPI00295857 | 1314           | COPA        | coatamer protein complex, subunit alpha                               | 0.445 |
| IPI00155168 | 5788           | PTPRC       | protein tyrosine phosphatase, receptor type, C                        | 0.434 |
| IPI00328257 | 162            | AP1B1       | adaptor-related protein complex 1, beta 1 subunit                     | 0.430 |
| IPI00017184 | 10938          | EHD1        | EH-domain containing 1                                                | 0.426 |

|             |        |           |                                                                            |        |
|-------------|--------|-----------|----------------------------------------------------------------------------|--------|
| IPI00022391 | 325    | APCS      | amyloid P component, serum                                                 | 0.422  |
| IPI00218638 | 4542   | MYO1F     | myosin IF                                                                  | 0.420  |
| IPI00303318 | 51571  | FAM49B    | family with sequence similarity 49, member B                               | 0.417  |
| IPI00654755 | 3043   | HBB       | hemoglobin, beta                                                           | -0.417 |
| IPI00021304 | 3849   | KRT2      | keratin 2 (epidermal ichthyosis bullosa of Siemens)                        | -0.424 |
| IPI00298497 | 2244   | FGB       | fibrinogen beta chain                                                      | -0.426 |
| IPI00006114 | 5176   | SERPINF1  | serpin peptidase inhibitor, clade F , member 1                             | -0.428 |
| IPI00414283 | 2335   | FN1       | fibronectin 1                                                              | -0.436 |
| IPI00298828 | 350    | APOH      | apolipoprotein H (beta-2-glycoprotein I)                                   | -0.440 |
| IPI00027019 | 5545   | PRB4      | proline-rich protein BstNI subfamily 4                                     | -0.453 |
| IPI00796878 | 94160  | ABCC12    | ATP-binding cassette, sub-family C (CFTR/MRP), member 12                   | -0.468 |
| IPI00022895 | 1      | A1BG      | alpha-1-B glycoprotein                                                     | -0.485 |
| IPI00006705 | 7356   | SCGB1A1   | secretoglobin, family 1A, member 1 (uteroglobin)                           | -0.487 |
| IPI00026320 | 51366  | UBR5      | ubiquitin protein ligase E3 component n-recognin 5                         | -0.516 |
| IPI00009865 | 3858   | KRT10     | keratin 10 (epidermolytic hyperkeratosis; keratosis palmaris et plantaris) | -0.522 |
| IPI00028306 | 85458  | DIXDC1    | DIX domain containing 1                                                    | -0.564 |
| IPI00298237 | 1200   | TPP1      | tripeptidyl peptidase I                                                    | -0.584 |
| IPI00021885 | 2243   | FGA       | fibrinogen alpha chain                                                     | -0.589 |
| IPI00216318 | 7529   | YWHAH     | tyrosine 3-monooxygenase/tryptophan 5-monooxygenase activation protein, I  | 0.408  |
| IPI00216699 | 83706  | FERMT3    | fermitin family homolog 3 (Drosophila)                                     | 0.404  |
| IPI00644712 | 2547   | XRCC6     | X-ray repair complementing defective repair in Chinese hamster cells 6     | 0.400  |
| IPI00306960 | 4677   | NARS      | asparaginyl-tRNA synthetase                                                | 0.397  |
| IPI00002459 | 309    | ANXA6     | annexin A6                                                                 | 0.391  |
| IPI00026185 | 832    | CAPZB     | capping protein (actin filament) muscle Z-line, beta                       | 0.391  |
| IPI00004573 | 5284   | PIGR      | polymeric immunoglobulin receptor                                          | 0.390  |
| IPI00022449 | 1794   | DOCK2     | dedicator of cytokinesis 2                                                 | 0.388  |
| IPI00001639 | 3837   | KPNB1     | karyopherin (importin) beta 1                                              | 0.387  |
| IPI00297160 | 960    | CD44      | CD44 molecule (Indian blood group)                                         | 0.384  |
| IPI00296654 | 80341  | BPIL1     | bactericidal/permeability-increasing protein-like 1                        | 0.384  |
| IPI00013219 | 3611   | ILK       | integrin-linked kinase                                                     | 0.381  |
| IPI00013163 | 4332   | MNDA      | myeloid cell nuclear differentiation antigen                               | 0.378  |
| IPI00783982 | 22820  | COPG      | coatamer protein complex, subunit gamma                                    | 0.377  |
| IPI00100160 | 55832  | CAND1     | cullin-associated and neddylation-dissociated 1                            | 0.377  |
| IPI00026833 | 159    | ADSS      | adenylosuccinate synthase                                                  | 0.377  |
| IPI00299547 | 3934   | LCN2      | lipocalin 2                                                                | 0.376  |
| IPI00014338 | 4689   | NCF4      | neutrophil cytosolic factor 4, 40kDa                                       | 0.375  |
| IPI00003348 | 2783   | GNB2      | guanine nucleotide binding protein (G protein), beta polypeptide 2         | 0.374  |
| IPI00220834 | 7520   | XRCC5     | X-ray repair complementing defective repair in Chinese hamster cells 5     | 0.374  |
| IPI00029769 | 3055   | HCK       | hemopoietic cell kinase                                                    | 0.373  |
| IPI00025202 | 752    | FMNL1     | formin-like 1                                                              | 0.373  |
| IPI00299024 | 10409  | BASP1     | brain abundant, membrane attached signal protein 1                         | 0.372  |
| IPI00027626 | 908    | CCT6A     | chaperonin containing TCP1, subunit 6A (zeta 1)                            | 0.370  |
| IPI00019971 | 6813   | STXBP2    | syntaxin binding protein 2                                                 | 0.368  |
| IPI00183046 | 5777   | PTPN6     | protein tyrosine phosphatase, non-receptor type 6                          | 0.366  |
| IPI00641229 | 3494   | IGHA2     | immunoglobulin heavy constant alpha 2 (A2m marker)                         | 0.365  |
| IPI00218646 | 1536   | CYBB      | cytochrome b-245, beta polypeptide (chronic granulomatous disease)         | 0.365  |
| IPI00060181 | 79180  | EFHD2     | EF-hand domain family, member D2                                           | 0.364  |
| IPI00216514 | 961    | CD47      | CD47 molecule                                                              | 0.364  |
| IPI00554811 | 10093  | ARPC4     | actin related protein 2/3 complex, subunit 4, 20kDa                        | 0.364  |
| IPI00010133 | 11151  | CORO1A    | coronin, actin binding protein, 1A                                         | 0.363  |
| IPI00005614 | 6711   | SPTBN1    | spectrin, beta, non-erythrocytic 1                                         | 0.362  |
| IPI00003935 | 8349   | HIST2H2BE | histone cluster 2, H2be                                                    | 0.360  |
| IPI00031131 | 57136  | C20orf3   | chromosome 20 open reading frame 3                                         | 0.359  |
| IPI00033494 | 103910 | MRLC2     | myosin regulatory light chain MRLC2                                        | 0.356  |
| IPI00010270 | 5880   | RAC2      | ras-related C3 botulinum toxin substrate 2                                 | 0.356  |
| IPI00009342 | 8826   | IQGAP1    | IQ motif containing GTPase activating protein 1                            | 0.354  |
| IPI00019038 | 4069   | LYZ       | lysozyme (renal amyloidosis)                                               | 0.346  |
| IPI00550212 | 23191  | CYFIP1    | cytoplasmic FMR1 interacting protein 1                                     | 0.345  |
| IPI00018146 | 10971  | YWHAQ     | tyrosine 3-monooxygenase/tryptophan 5-monooxygenase activation protein, I  | 0.345  |
| IPI00029568 | 5806   | PTX3      | pentraxin-related gene, rapidly induced by IL-1 beta                       | 0.340  |
| IPI00328350 | 116496 | FAM129A   | family with sequence similarity 129, member A                              | 0.338  |
| IPI00020599 | 811    | CALR      | calreticulin                                                               | 0.338  |

|             |        |           |                                                                                         |       |
|-------------|--------|-----------|-----------------------------------------------------------------------------------------|-------|
| IPI0000105  | 9961   | MVP       | major vault protein                                                                     | 0.337 |
| IPI00018465 | 10574  | CCT7      | chaperonin containing TCP1, subunit 7 (eta)                                             | 0.334 |
| IPI00012578 | 3840   | KPNA4     | karyopherin alpha 4 (importin alpha 3)                                                  | 0.334 |
| IPI00216256 | 9948   | WDR1      | WD repeat domain 1                                                                      | 0.330 |
| IPI00302927 | 10575  | CCT4      | chaperonin containing TCP1, subunit 4 (delta)                                           | 0.330 |
| IPI00643920 | 7086   | TKT       | transketolase (Wernicke-Korsakoff syndrome)                                             | 0.329 |
| IPI00033022 | 1785   | DNM2      | dynamitin 2                                                                             | 0.328 |
| IPI00019502 | 4627   | MYH9      | myosin, heavy chain 9, non-muscle                                                       | 0.322 |
| IPI00216008 | 2539   | G6PD      | glucose-6-phosphate dehydrogenase                                                       | 0.317 |
| IPI00005721 | 1667   | DEFA1     | defensin, alpha 1; defensin, alpha 1                                                    | 0.315 |
| IPI00465439 | 226    | ALDOA     | aldolase A, fructose-bisphosphate                                                       | 0.311 |
| IPI00220301 | 9588   | PRDX6     | peroxiredoxin 6                                                                         | 0.307 |
| IPI00026268 | 2782   | GNB1      | guanine nucleotide binding protein (G protein), beta polypeptide 1                      | 0.304 |
| IPI00294187 | 11240  | PADI2     | peptidyl arginine deiminase, type II                                                    | 0.302 |
| IPI00024915 | 25824  | PRDX5     | peroxiredoxin 5                                                                         | 0.299 |
| IPI00552578 | 6288   | SAA1      | serum amyloid A1                                                                        | 0.299 |
| IPI00018873 | 10135  | NAMPT     | nicotinamide phosphoribosyltransferase                                                  | 0.299 |
| IPI00152418 | 1604   | CD55      | CD55 molecule, decay accelerating factor for complement                                 | 0.298 |
| IPI00453473 | 8294   | HIST1H4I  | histone cluster 1, H4i                                                                  | 0.293 |
| IPI00218131 | 6283   | S100A12   | S100 calcium binding protein A12                                                        | 0.293 |
| IPI00641950 | 10399  | GNB2L1    | guanine nucleotide binding protein (G protein), beta polypeptide 2-like 1               | 0.292 |
| IPI00021070 | 4688   | NCF2      | neutrophil cytosolic factor 2 (65kDa, chronic granulomatous disease, autosome)          | 0.292 |
| IPI00220740 | 4869   | NPM1      | nucleophosmin (nucleolar phosphoprotein B23, numatrin)                                  | 0.291 |
| IPI00065486 | 10058  | ATCB6     | ATP-binding cassette, sub-family B (MDR/TAP), member 6                                  | 0.291 |
| IPI00157757 | 64780  | MICAL1    | microtubule associated monooxygenase, calponin and LIM domain containing                | 0.291 |
| IPI00008307 | 23569  | PADI4     | peptidyl arginine deiminase, type IV                                                    | 0.291 |
| IPI00296526 | 55577  | NAGK      | N-acetylglucosamine kinase                                                              | 0.287 |
| IPI00297779 | 10576  | CCT2      | chaperonin containing TCP1, subunit 2 (beta)                                            | 0.286 |
| IPI00219682 | 2040   | STOM      | stomatin                                                                                | 0.284 |
| IPI00012007 | 191    | AHCY      | S-adenosylhomocysteine hydrolase                                                        | 0.279 |
| IPI00171611 | 126961 | HIST2H3C  | histone cluster 2, H3c                                                                  | 0.278 |
| IPI00292530 | 3697   | ITIH1     | inter-alpha (globulin) inhibitor H1                                                     | 0.273 |
| IPI00298961 | 7514   | XPO1      | exportin 1 (CRM1 homolog, yeast)                                                        | 0.271 |
| IPI00021263 | 7534   | YWHAZ     | tyrosine 3-monooxygenase/tryptophan 5-monooxygenase activation protein, zeta            | 0.268 |
| IPI00456969 | 1778   | DYNC1H1   | dynein, cytoplasmic 1, heavy chain 1                                                    | 0.268 |
| IPI00013808 | 81     | ACTN4     | actinin, alpha 4                                                                        | 0.267 |
| IPI00003949 | 7334   | UBE2N     | ubiquitin-conjugating enzyme E2N (UBC13 homolog, yeast)                                 | 0.266 |
| IPI00789605 | 4637   | MYL6      | myosin, light chain 6, alkali, smooth muscle and non-muscle                             | 0.266 |
| IPI00024095 | 306    | ANXA3     | annexin A3                                                                              | 0.264 |
| IPI00306436 | 6774   | STAT3     | signal transducer and activator of transcription 3 (acute-phase response factor)        | 0.263 |
| IPI00005118 | 3101   | HK3       | hexokinase 3 (white cell)                                                               | 0.258 |
| IPI00011285 | 823    | CAPN1     | calpain 1, (mu/I) large subunit                                                         | 0.257 |
| IPI00022977 | 1152   | CKB       | creatine kinase, brain                                                                  | 0.256 |
| IPI00027444 | 1992   | SERPINB1  | serpin peptidase inhibitor, clade B (ovalbumin), member 1                               | 0.255 |
| IPI00298994 | 7094   | TLN1      | talin 1                                                                                 | 0.255 |
| IPI00027230 | 7184   | HSP90B1   | heat shock protein 90kDa beta (Grp94), member 1                                         | 0.254 |
| IPI00147874 | 54187  | NANS      | N-acetylneuraminic acid synthase (sialic acid synthase)                                 | 0.253 |
| IPI00005162 | 10094  | ARPC3     | actin related protein 2/3 complex, subunit 3, 21kDa                                     | 0.253 |
| IPI00027007 | 648998 | LOC648998 | similar to Neutrophil cytosol factor 1                                                  | 0.252 |
| IPI00219038 | 3020   | H3F3A     | H3 histone, family 3A                                                                   | 0.252 |
| IPI00005159 | 10097  | ACTR2     | ARP2 actin-related protein 2 homolog (yeast)                                            | 0.250 |
| IPI00220578 | 2773   | GNAI3     | guanine nucleotide binding protein (G protein), alpha inhibiting activity polypeptide 3 | 0.247 |
| IPI00217906 | 2771   | GNAI2     | guanine nucleotide binding protein (G protein), alpha inhibiting activity polypeptide 2 | 0.246 |
| IPI00184996 | 57119  | SPINLW1   | serine peptidase inhibitor-like, with Kunitz and WAP domains 1 (eppin)                  | 0.246 |
| IPI00022744 | 1434   | CSE1L     | CSE1 chromosome segregation 1-like (yeast)                                              | 0.244 |
| IPI00007682 | 523    | ATP6V1A   | ATPase, H+ transporting, lysosomal 70kDa, V1 subunit A                                  | 0.243 |
| IPI00419916 | 249    | ALPL      | alkaline phosphatase, liver/bone/kidney                                                 | 0.240 |
| IPI00021439 | 60     | ACTB      | actin, beta                                                                             | 0.238 |
| IPI00010471 | 3936   | LCP1      | lymphocyte cytosolic protein 1 (L-plastin)                                              | 0.237 |
| IPI00005969 | 829    | CAPZA1    | capping protein (actin filament) muscle Z-line, alpha 1                                 | 0.236 |
| IPI00384051 | 5721   | PSME2     | proteasome (prosome, macropain) activator subunit 2 (PA28 beta)                         | 0.235 |
| IPI00168184 | 5518   | PPP2R1A   | protein phosphatase 2 (formerly 2A), regulatory subunit A, alpha isoform                | 0.229 |

|             |        |           |                                                                                  |       |
|-------------|--------|-----------|----------------------------------------------------------------------------------|-------|
| IPI00292858 | 1890   | TYMP      | thymidine phosphorylase                                                          | 0.228 |
| IPI00217966 | 3939   | LDHA      | lactate dehydrogenase A                                                          | 0.226 |
| IPI00642211 | 6051   | RNPEP     | arginyl aminopeptidase (aminopeptidase B)                                        | 0.225 |
| IPI00026216 | 9520   | NPEPPS    | aminopeptidase puromycin sensitive                                               | 0.225 |
| IPI00022229 | 338    | APOB      | apolipoprotein B (including Ag(x) antigen)                                       | 0.222 |
| IPI00028091 | 10096  | ACTR3     | ARP3 actin-related protein 3 homolog (yeast)                                     | 0.222 |
| IPI00005161 | 10109  | ARPC2     | actin related protein 2/3 complex, subunit 2, 34kDa                              | 0.221 |
| IPI00013418 | 329    | BIRC2     | baculoviral IAP repeat-containing 2                                              | 0.220 |
| IPI00018931 | 55737  | VPS35     | vacuolar protein sorting 35 homolog (S. cerevisiae)                              | 0.208 |
| IPI00022774 | 7415   | VCP       | valosin-containing protein                                                       | 0.204 |
| IPI00000873 | 7407   | VARS      | valyl-tRNA synthetase                                                            | 0.203 |
| IPI00026781 | 2194   | FASN      | fatty acid synthase                                                              | 0.202 |
| IPI00029468 | 10121  | ACTR1A    | ARP1 actin-related protein 1 homolog A, centractin alpha (yeast)                 | 0.195 |
| IPI00011654 | 203068 | TUBB      | tubulin, beta                                                                    | 0.190 |
| IPI00329331 | 7360   | UGP2      | UDP-glucose pyrophosphorylase 2                                                  | 0.185 |
| IPI00855918 | 727897 | MUC5B     | mucin 5B, oligomeric mucus/gel-forming                                           | 0.181 |
| IPI00026087 | 8815   | BANF1     | barrier to autointegration factor 1                                              | 0.178 |
| IPI00022371 | 3273   | HRG       | histidine-rich glycoprotein                                                      | 0.178 |
| IPI00103552 | 94025  | MUC16     | mucin 16, cell surface associated                                                | 0.175 |
| IPI00000816 | 7531   | YWHAE     | tyrosine 3-monooxygenase/tryptophan 5-monooxygenase activation protein, $\alpha$ | 0.168 |
| IPI00010896 | 1192   | CLIC1     | chloride intracellular channel 1                                                 | 0.168 |
| IPI00219077 | 4048   | LTA4H     | leukotriene A4 hydrolase                                                         | 0.168 |
| IPI00020567 | 392    | ARHGAP1   | Rho GTPase activating protein 1                                                  | 0.163 |
| IPI00477597 | 3250   | HPR       | haptoglobin-related protein                                                      | 0.159 |
| IPI00641073 | 80736  | SLC44A4   | solute carrier family 44, member 4                                               | 0.158 |
| IPI00004358 | 5834   | PYGB      | phosphorylase, glycogen; brain                                                   | 0.156 |
| IPI00296608 | 730    | C7        | complement component 7                                                           | 0.142 |
| IPI00026119 | 7317   | UBA1      | ubiquitin-like modifier activating enzyme 1                                      | 0.141 |
| IPI00018342 | 203    | AK1       | adenylate kinase 1                                                               | 0.139 |
| IPI00739237 | 653879 | LOC653879 | similar to Complement C3 precursor                                               | 0.138 |
| IPI00465248 | 2023   | ENO1      | enolase 1, (alpha)                                                               | 0.137 |
| IPI00003865 | 3312   | HSPA8     | heat shock 70kDa protein 8                                                       | 0.137 |
| IPI00000874 | 5052   | PRDX1     | peroxiredoxin 1                                                                  | 0.131 |
| IPI00012500 | 83990  | BRIP1     | BRCA1 interacting protein C-terminal helicase 1                                  | 0.128 |
| IPI00218993 | 10808  | HSPH1     | heat shock 105kDa/110kDa protein 1                                               | 0.125 |
| IPI00023860 | 4673   | NAP1L1    | nucleosome assembly protein 1-like 1                                             | 0.124 |
| IPI00219365 | 4478   | MSN       | moesin                                                                           | 0.122 |
| IPI00008433 | 6193   | RPS5      | ribosomal protein S5                                                             | 0.122 |
| IPI00257882 | 5184   | PEPD      | peptidase D                                                                      | 0.121 |
| IPI00290770 | 7203   | CCT3      | chaperonin containing TCP1, subunit 3 (gamma)                                    | 0.121 |
| IPI00294739 | 25939  | SAMHD1    | SAM domain and HD domain 1                                                       | 0.120 |
| IPI00012503 | 5660   | PSAP      | prosaposin (variant Gaucher disease and variant metachromatic leukodystrophy)    | 0.118 |
| IPI00030936 | 10103  | TSPAN1    | tetraspanin 1                                                                    | 0.109 |
| IPI00305461 | 3698   | ITIH2     | inter-alpha (globulin) inhibitor H2                                              | 0.107 |
| IPI00219525 | 5226   | PGD       | phosphogluconate dehydrogenase                                                   | 0.106 |
| IPI00305978 | 8574   | AKR7A2    | aldo-keto reductase family 7, member A2 (aflatoxin aldehyde reductase)           | 0.101 |
| IPI00022426 | 259    | AMBP      | alpha-1-microglobulin/bikunin precursor                                          | 0.099 |
| IPI00018451 | 10519  | CIB1      | calcium and integrin binding 1 (calmyrin)                                        | 0.098 |
| IPI00291175 | 7414   | VCL       | vinculin                                                                         | 0.097 |
| IPI00419585 | 5478   | PPIA      | peptidylprolyl isomerase A (cyclophilin A)                                       | 0.093 |
| IPI00013955 | 4582   | MUC1      | mucin 1, cell surface associated                                                 | 0.090 |
| IPI00550069 | 6050   | RNH1      | ribonuclease/angiogenin inhibitor 1                                              | 0.089 |
| IPI00643041 | 5901   | RAN       | RAN, member RAS oncogene family                                                  | 0.088 |
| IPI00013004 | 8566   | PDXK      | pyridoxal (pyridoxine, vitamin B6) kinase                                        | 0.088 |
| IPI00215914 | 375    | ARF1      | ADP-ribosylation factor 1                                                        | 0.086 |
| IPI00027223 | 3417   | IDH1      | isocitrate dehydrogenase 1 (NADP+), soluble                                      | 0.084 |
| IPI00302592 | 2316   | FLNA      | filamin A, alpha (actin binding protein 280)                                     | 0.082 |
| IPI00007058 | 57175  | CORO1B    | coronin, actin binding protein, 1B                                               | 0.081 |
| IPI00103397 | 4586   | MUC5AC    | mucin 5AC, oligomeric mucus/gel-forming                                          | 0.081 |
| IPI00016513 | 10890  | RAB10     | RAB10, member RAS oncogene family                                                | 0.080 |
| IPI00418471 | 7431   | VIM       | vimentin                                                                         | 0.080 |
| IPI00847989 | 5315   | PKM2      | pyruvate kinase, muscle                                                          | 0.072 |

|             |        |           |                                                                               |        |
|-------------|--------|-----------|-------------------------------------------------------------------------------|--------|
| IPI00026314 | 2934   | GSN       | gelsolin (amyloidosis, Finnish type)                                          | 0.071  |
| IPI00023673 | 3959   | LGALS3BP  | lectin, galactoside-binding, soluble, 3 binding protein                       | 0.070  |
| IPI00414676 | 3326   | HSP90AB1  | heat shock protein 90kDa alpha (cytosolic), class B member 1                  | 0.069  |
| IPI00216319 | 7533   | YWHAH     | tyrosine 3-monooxygenase/tryptophan 5-monooxygenase activation protein, 1     | 0.067  |
| IPI00030781 | 6772   | STAT1     | signal transducer and activator of transcription 1, 91kDa                     | 0.064  |
| IPI00012011 | 1072   | CFL1      | cofilin 1 (non-muscle)                                                        | 0.056  |
| IPI00220642 | 7532   | YWHAH     | tyrosine 3-monooxygenase/tryptophan 5-monooxygenase activation protein, 1     | 0.055  |
| IPI00007812 | 526    | ATP6V1B2  | ATPase, H <sup>+</sup> transporting, lysosomal 56/58kDa, V1 subunit B2        | 0.055  |
| IPI00215768 | 2729   | GCLC      | glutamate-cysteine ligase, catalytic subunit                                  | 0.055  |
| IPI00000581 | 55611  | OTUB1     | OTU domain, ubiquitin aldehyde binding 1                                      | 0.051  |
| IPI00745872 | 213    | ALB       | albumin                                                                       | 0.051  |
| IPI00178926 | 3512   | IGJ       | immunoglobulin J polypeptide, linker protein for immunoglobulin alpha and m   | 0.046  |
| IPI00291410 | 92747  | C20orf114 | chromosome 20 open reading frame 114                                          | 0.042  |
| IPI00022389 | 1401   | CRP       | C-reactive protein, pentraxin-related                                         | 0.040  |
| IPI00027463 | 6277   | S100A6    | S100 calcium binding protein A6                                               | 0.039  |
| IPI00017601 | 1356   | CP        | ceruloplasmin (ferroxidase)                                                   | 0.038  |
| IPI00165579 | 55748  | CNDP2     | CNDP dipeptidase 2 (metallopeptidase M20 family)                              | 0.037  |
| IPI00012889 | 653509 | SFTPA1    | surfactant, pulmonary-associated protein A1                                   | 0.036  |
| IPI00179330 | 6233   | RPS27A    | ribosomal protein S27a                                                        | 0.036  |
| IPI00298971 | 7448   | VTN       | vitronectin                                                                   | 0.035  |
| IPI00431645 | 3240   | HP        | haptoglobin                                                                   | 0.034  |
| IPI00186290 | 1938   | EEF2      | eukaryotic translation elongation factor 2                                    | 0.032  |
| IPI00171199 | 5684   | PSMA3     | proteasome (prosome, macropain) subunit, alpha type, 3                        | 0.031  |
| IPI00016786 | 998    | CDC42     | cell division cycle 42 (GTP binding protein, 25kDa)                           | 0.029  |
| IPI00219217 | 3945   | LDHB      | lactate dehydrogenase B                                                       | 0.026  |
| IPI00003362 | 3309   | HSPA5     | heat shock 70kDa protein 5 (glucose-regulated protein, 78kDa)                 | 0.024  |
| IPI00021854 | 336    | APOA2     | apolipoprotein A-II                                                           | 0.024  |
| IPI00013698 | 427    | ASAH1     | N-acylsphingosine amidohydrolase (acid ceramidase) 1                          | 0.022  |
| IPI00032328 | 3827   | KNG1      | kininogen 1                                                                   | 0.021  |
| IPI00031461 | 2665   | GDI2      | GDP dissociation inhibitor 2                                                  | 0.016  |
| IPI00246058 | 10015  | PDCD6IP   | programmed cell death 6 interacting protein                                   | 0.015  |
| IPI00304925 | 3303   | HSPA1A    | heat shock 70kDa protein 1A                                                   | 0.014  |
| IPI00414320 | 311    | ANXA11    | annexin A11                                                                   | 0.012  |
| IPI00008274 | 10487  | CAP1      | CAP, adenylate cyclase-associated protein 1 (yeast)                           | 0.011  |
| IPI00010720 | 22948  | CCT5      | chaperonin containing TCP1, subunit 5 (epsilon)                               | 0.004  |
| IPI00025491 | 1973   | EIF4A1    | eukaryotic translation initiation factor 4A, isoform 1                        | 0.004  |
| IPI00018909 | 7033   | TFF3      | trefoil factor 3 (intestinal)                                                 | 0.003  |
| IPI00291262 | 1191   | CLU       | clusterin                                                                     | 0.001  |
| IPI00013890 | 2810   | SFN       | stratifin                                                                     | -0.002 |
| IPI00746388 | 7430   | EZR       | ezrin                                                                         | -0.003 |
| IPI00456750 | 64855  | FAM129B   | family with sequence similarity 129, member B                                 | -0.005 |
| IPI00025084 | 826    | CAPNS1    | calpain, small subunit 1                                                      | -0.006 |
| IPI00291866 | 710    | SERPINE1  | serpin peptidase inhibitor, clade G (C1 inhibitor), member 1, (angioedema, he | -0.018 |
| IPI00005171 | 3122   | HLA-DRA   | major histocompatibility complex, class II, DR alpha                          | -0.018 |
| IPI00026260 | 4831   | NME2      | non-metastatic cells 2, protein (NM23B) expressed in                          | -0.019 |
| IPI00013895 | 6282   | S100A11   | S100 calcium binding protein A11                                              | -0.020 |
| IPI00169383 | 5230   | PGK1      | phosphoglycerate kinase 1                                                     | -0.021 |
| IPI00478231 | 387    | RHOA      | ras homolog gene family, member A                                             | -0.022 |
| IPI00032313 | 6275   | S100A4    | S100 calcium binding protein A4                                               | -0.026 |
| IPI00218918 | 301    | ANXA1     | annexin A1                                                                    | -0.027 |
| IPI00218251 | 7052   | TGM2      | transglutaminase 2 (C polypeptide, protein-glutamine-gamma-glutamyltransfe    | -0.027 |
| IPI00218319 | 7170   | TPM3      | tropomyosin 3                                                                 | -0.028 |
| IPI00029260 | 929    | CD14      | CD14 molecule                                                                 | -0.028 |
| IPI00299086 | 6386   | SDCBP     | syndecan binding protein (syntenin)                                           | -0.031 |
| IPI00166768 | 84790  | TUBA1C    | tubulin, alpha 1c                                                             | -0.031 |
| IPI00010779 | 7171   | TPM4      | tropomyosin 4                                                                 | -0.034 |
| IPI00304273 | 337    | APOA4     | apolipoprotein A-IV                                                           | -0.034 |
| IPI00018031 | 221    | ALDH3B1   | aldehyde dehydrogenase 3 family, member B1                                    | -0.038 |
| IPI00215997 | 928    | CD9       | CD9 molecule                                                                  | -0.044 |
| IPI00382470 | 3320   | HSP90AA1  | heat shock protein 90kDa alpha (cytosolic), class A member 1                  | -0.048 |
| IPI00289758 | 824    | CAPN2     | calpain 2, (mII) large subunit                                                | -0.049 |
| IPI00255052 | 4715   | NDUFB9    | NADH dehydrogenase (ubiquinone) 1 beta subcomplex, 9, 22kDa                   | -0.052 |

|             |        |          |                                                                                 |        |
|-------------|--------|----------|---------------------------------------------------------------------------------|--------|
| IPI00021841 | 335    | APOA1    | apolipoprotein A-I                                                              | -0.056 |
| IPI00296083 | 6439   | SFTPB    | surfactant, pulmonary-associated protein B                                      | -0.060 |
| IPI00156689 | 10493  | VAT1     | vesicle amine transport protein 1 homolog (T. californica)                      | -0.060 |
| IPI00019568 | 2147   | F2       | coagulation factor II (thrombin)                                                | -0.061 |
| IPI00022395 | 735    | C9       | complement component 9                                                          | -0.062 |
| IPI00168728 | 3507   | IGHM     | immunoglobulin heavy constant mu                                                | -0.064 |
| IPI00219757 | 2950   | GSTP1    | glutathione S-transferase pi                                                    | -0.064 |
| IPI00797709 | 23603  | CORO1C   | coronin, actin binding protein, 1C                                              | -0.064 |
| IPI00218192 | 3700   | ITIH4    | inter-alpha (globulin) inhibitor H4 (plasma Kallikrein-sensitive glycoprotein)  | -0.067 |
| IPI00027442 | 16     | AARS     | alanyl-tRNA synthetase                                                          | -0.067 |
| IPI00032179 | 462    | SERPINC1 | serpin peptidase inhibitor, clade C (antithrombin), member 1                    | -0.071 |
| IPI00000190 | 975    | CD81     | CD81 molecule                                                                   | -0.072 |
| IPI00657682 | 2938   | GSTA1    | glutathione S-transferase A1                                                    | -0.074 |
| IPI00005160 | 10095  | ARPC1B   | actin related protein 2/3 complex, subunit 1B, 41kDa                            | -0.079 |
| IPI00219018 | 2597   | GAPDH    | glyceraldehyde-3-phosphate dehydrogenase                                        | -0.087 |
| IPI00029863 | 5345   | SERPINF2 | serpin peptidase inhibitor, clade F, member 2                                   | -0.092 |
| IPI00021857 | 345    | APOC3    | apolipoprotein C-III                                                            | -0.092 |
| IPI00218732 | 5444   | PON1     | paraoxonase 1                                                                   | -0.094 |
| IPI00555812 | 2638   | GC       | group-specific component (vitamin D binding protein)                            | -0.094 |
| IPI00166866 | 3493   | IGHA1    | immunoglobulin heavy constant alpha 1                                           | -0.097 |
| IPI00007067 | 152007 | C9orf19  | chromosome 9 open reading frame 19                                              | -0.104 |
| IPI00022429 | 5004   | ORM1     | orosomucoid 1                                                                   | -0.109 |
| IPI00022624 | 9052   | GPRC5A   | G protein-coupled receptor, family C, group 5, member A                         | -0.112 |
| IPI00290566 | 6950   | TCP1     | t-complex 1                                                                     | -0.117 |
| IPI00784002 | 26278  | SACS     | spastic ataxia of Charlevoix-Saguenay (sacsin)                                  | -0.119 |
| IPI00006662 | 347    | APOD     | apolipoprotein D                                                                | -0.125 |
| IPI00478003 | 2      | A2M      | alpha-2-macroglobulin                                                           | -0.126 |
| IPI00305622 | 7051   | TGM1     | transglutaminase 1                                                              | -0.129 |
| IPI00032220 | 183    | AGT      | angiotensinogen (serpin peptidase inhibitor, clade A, member 8)                 | -0.133 |
| IPI00418169 | 302    | ANXA2    | annexin A2                                                                      | -0.133 |
| IPI00022488 | 3263   | HPX      | hemopexin                                                                       | -0.134 |
| IPI00099110 | 1755   | DMBT1    | deleted in malignant brain tumors 1                                             | -0.136 |
| IPI00292950 | 3053   | SERPIND1 | serpin peptidase inhibitor, clade D (heparin cofactor), member 1                | -0.137 |
| IPI00019591 | 629    | CFB      | complement factor B                                                             | -0.149 |
| IPI00027341 | 822    | CAPG     | capping protein (actin filament), gelsolin-like                                 | -0.153 |
| IPI00879709 | 729    | C6       | complement component 6                                                          | -0.153 |
| IPI00793199 | 307    | ANXA4    | annexin A4                                                                      | -0.153 |
| IPI00514026 | 375790 | AGRN     | agrln                                                                           | -0.165 |
| IPI00025447 | 1915   | EEF1A1   | eukaryotic translation elongation factor 1 alpha 1                              | -0.169 |
| IPI00014055 | 9476   | NAPSA    | napsin A aspartic peptidase                                                     | -0.171 |
| IPI00892671 | 3500   | IGHG1    | immunoglobulin heavy constant gamma 1 (G1m marker)                              | -0.172 |
| IPI00218914 | 216    | ALDH1A1  | aldehyde dehydrogenase 1 family, member A1                                      | -0.174 |
| IPI00465352 | 828    | CAPS     | calcyphosine                                                                    | -0.180 |
| IPI00029658 | 2202   | EFEMP1   | EGF-containing fibulin-like extracellular matrix protein 1                      | -0.181 |
| IPI00221221 | 246    | ALOX15   | arachidonate 15-lipoxygenase                                                    | -0.181 |
| IPI00295400 | 7453   | WARS     | tryptophanyl-tRNA synthetase                                                    | -0.182 |
| IPI00410714 | 3039   | HBA1     | hemoglobin, alpha 1                                                             | -0.183 |
| IPI00019580 | 5340   | PLG      | plasminogen                                                                     | -0.184 |
| IPI00296183 | 218    | ALDH3A1  | aldehyde dehydrogenase 3 family, member A1                                      | -0.188 |
| IPI00021855 | 341    | APOC1    | apolipoprotein C-I                                                              | -0.188 |
| IPI00030706 | 10598  | AHSA1    | AHA1, activator of heat shock 90kDa protein ATPase homolog 1 (yeast)            | -0.190 |
| IPI00221224 | 290    | ANPEP    | alanyl (membrane) aminopeptidase                                                | -0.190 |
| IPI00032258 | 720    | C4A      | complement component 4A (Rodgers blood group)                                   | -0.192 |
| IPI00008494 | 3383   | ICAM1    | intercellular adhesion molecule 1 (CD54), human rhinovirus receptor             | -0.200 |
| IPI00455174 | 57186  | C20orf74 | chromosome 20 open reading frame 74                                             | -0.207 |
| IPI00011229 | 1509   | CTSD     | cathepsin D                                                                     | -0.208 |
| IPI00022463 | 7018   | TF       | transferrin                                                                     | -0.221 |
| IPI00032291 | 727    | C5       | complement component 5                                                          | -0.223 |
| IPI00002966 | 3308   | HSPA4    | heat shock 70kDa protein 4                                                      | -0.224 |
| IPI00001699 | 29108  | PYCARD   | PYD and CARD domain containing                                                  | -0.227 |
| IPI00021727 | 722    | C4BPA    | complement component 4 binding protein, alpha                                   | -0.230 |
| IPI00553177 | 5265   | SERPINA1 | serpin peptidase inhibitor, clade A (alpha-1 antiproteinase, antitrypsin), memb | -0.231 |

|             |        |           |                                                                                 |        |
|-------------|--------|-----------|---------------------------------------------------------------------------------|--------|
| IPI00066193 | 92304  | SCGB3A1   | secretoglobin, family 3A, member 1                                              | -0.236 |
| IPI00022394 | 714    | C1QC      | complement component 1, q subcomponent, C chain                                 | -0.237 |
| IPI00477992 | 713    | C1QB      | complement component 1, q subcomponent, B chain                                 | -0.238 |
| IPI00032311 | 3929   | LBP       | lipopolysaccharide binding protein                                              | -0.239 |
| IPI00294395 | 732    | C8B       | complement component 8, beta polypeptide                                        | -0.242 |
| IPI00021842 | 348    | APOE      | apolipoprotein E                                                                | -0.258 |
| IPI00329801 | 308    | ANXA5     | annexin A5                                                                      | -0.258 |
| IPI00004656 | 567    | B2M       | beta-2-microglobulin                                                            | -0.265 |
| IPI00289499 | 471    | ATIC      | 5-aminoimidazole-4-carboxamide ribonucleotide formyltransferase/IMP cyclol      | -0.268 |
| IPI00022431 | 197    | AHSG      | alpha-2-HS-glycoprotein                                                         | -0.268 |
| IPI00291878 | 6441   | SFTPD     | surfactant, pulmonary-associated protein D                                      | -0.279 |
| IPI00021891 | 2266   | FGG       | fibrinogen gamma chain                                                          | -0.284 |
| IPI00007910 | 10568  | SLC34A2   | solute carrier family 34 (sodium phosphate), member 2                           | -0.286 |
| IPI00060800 | 124220 | LOC124220 | similar to common salivary protein 1                                            | -0.288 |
| IPI00018219 | 7045   | TGFBI     | transforming growth factor, beta-induced, 68kDa                                 | -0.304 |
| IPI00478209 | 401409 | RAB19     | RAB19, member RAS oncogene family                                               | -0.305 |
| IPI00301618 | 9147   | SDCCAG1   | serologically defined colon cancer antigen 1                                    | -0.307 |
| IPI00029739 | 3075   | CFH       | complement factor H                                                             | -0.309 |
| IPI00220151 | 9990   | SLC12A6   | solute carrier family 12 (potassium/chloride transporters), member 6            | -0.315 |
| IPI00217778 | 5360   | PLTP      | phospholipid transfer protein                                                   | -0.317 |
| IPI00073772 | 2203   | FBP1      | fructose-1,6-bisphosphatase 1                                                   | -0.326 |
| IPI00019359 | 3857   | KRT9      | keratin 9 (epidermolytic palmoplantar keratoderma)                              | -0.350 |
| IPI00020091 | 5005   | ORM2      | orosomuroid 2                                                                   | -0.354 |
| IPI00550363 | 8407   | TAGLN2    | transgelin 2                                                                    | -0.370 |
| IPI00293925 | 8547   | FCN3      | ficolin (collagen/fibrinogen domain containing) 3 (Hakata antigen)              | -0.385 |
| IPI00220327 | 3848   | KRT1      | keratin 1 (epidermolytic hyperkeratosis)                                        | -0.408 |
| IPI00550991 | 12     | SERPINA3  | serpin peptidase inhibitor, clade A (alpha-1 antiproteinase, antitrypsin), memb | -0.415 |
